# Supplementary material for: Monitoring Autophagy Immunohistochemically and Ultrastructurally during Human Head and Neck Carcinogenesis. Relationship with the DNA Damage Response Pathway
Source: MDPI journal article supplement (doi:10.3390/ijms18091920), 2017-09-07
Supplement: s1 [file s1]

**Monitoring autophagy immunohistochemically and ultrastructurally during human head and neck carcinogenesis. Relationship with the DNA Damage Response pathway.**

**mHscores values**

**Head and Neck lesions**

|                |             | <b>Cytoplasmic</b> | <b>Sterror</b> | <b>Nuclear</b> | <b>Sterror</b> |
|----------------|-------------|--------------------|----------------|----------------|----------------|
| <b>Beclin1</b> | Normal      | 1,00               | 0,44           | 2,17           | 0,44           |
|                | Hyperplasia | 1,15               | 0,71           | 2,80           | 0,63           |
|                | Dysplasia   | 2,43               | 1,06           | 1,40           | 0,54           |
|                | Tumor       | 3,14               | 0,65           | 0,46           | 0,30           |

|             |             | <b>Cytoplasmic</b> | <b>Sterror</b> | <b>Nuclear</b> | <b>Sterror</b> |
|-------------|-------------|--------------------|----------------|----------------|----------------|
| <b>LC3B</b> | Normal      | 0,79               | 0,42           | 0,82           | 0,60           |
|             | Hyperplasia | 0,02               | 0,02           | 2,36           | 0,53           |
|             | Dysplasia   | 0,54               | 0,38           | 3,22           | 0,92           |
|             | Tumor       | 1,80               | 0,73           | 3,80           | 0,80           |

|            |             | <b>Cytoplasmic</b> | <b>Sterror</b> | <b>Nuclear</b> | <b>Sterror</b> |
|------------|-------------|--------------------|----------------|----------------|----------------|
| <b>p62</b> | Normal      | 0,47               | 0,45           | 0,36           | 0,24           |
|            | Hyperplasia | 0,52               | 0,43           | 3,29           | 1,30           |
|            | Dysplasia   | 1,20               | 0,37           | 3,51           | 0,75           |
|            | Tumor       | 1,02               | 0,46           | 4,93           | 0,82           |
